# Supplementary material for: Overexpression of Id1 in transgenic mice promotes mammary basal stem cell activity and breast tumorigenesis
Source: PubMed Central journal article supplement (PMC4627307; doi:10.18632/oncotarget.3640), 2015-04-16
Supplement: oncotarget-06-17276-s001.pdf [file oncotarget-06-17276-s001.pdf]

## SUPPLEMENTARY FIGURE AND TABLE

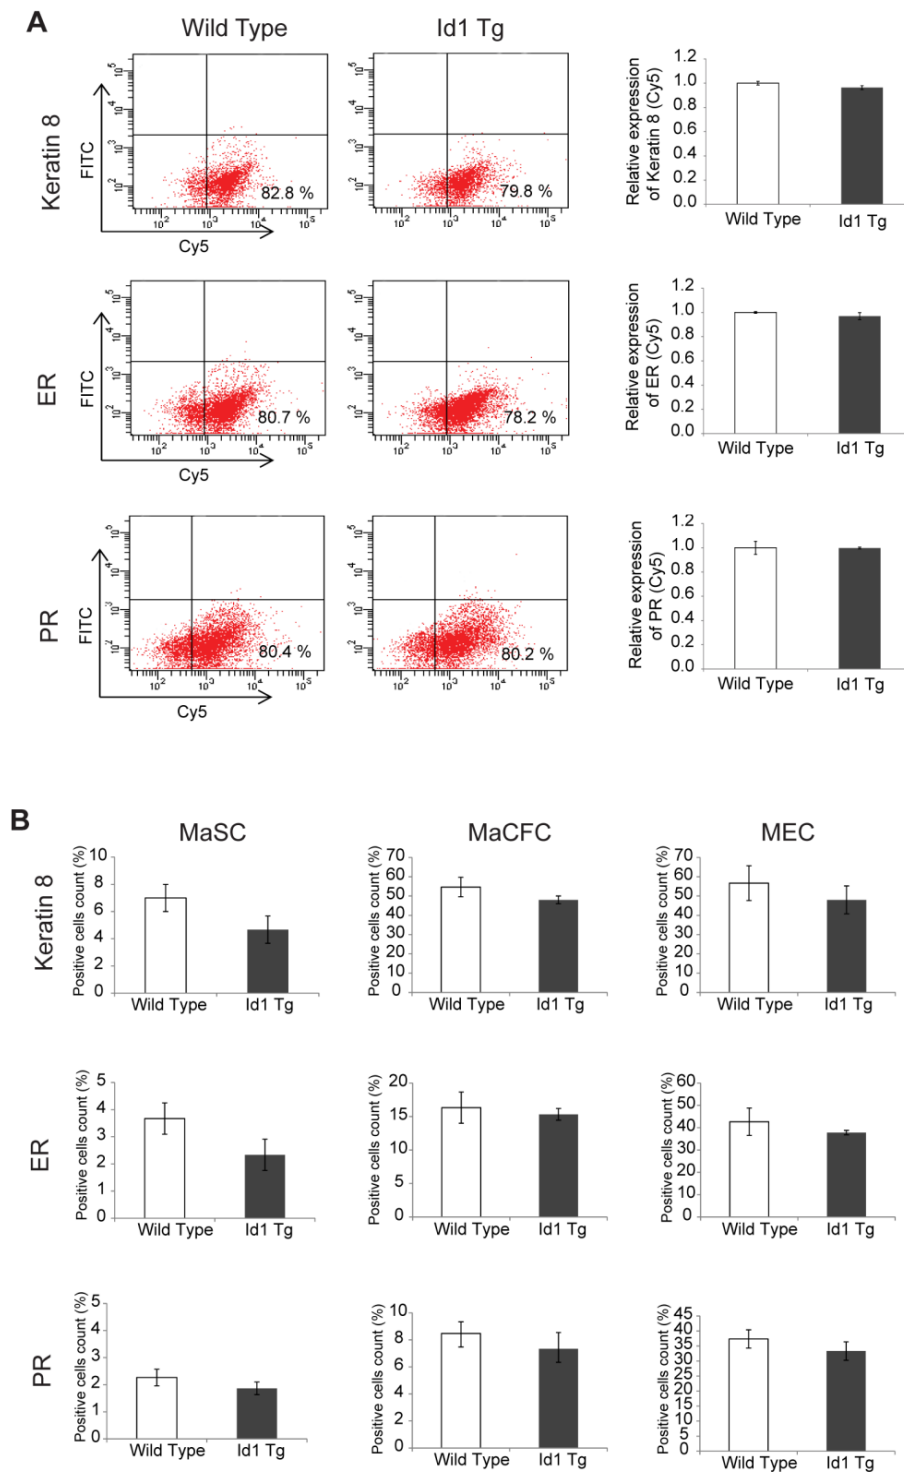

**Supplementary Figure S1: Expression of luminal markers in MMTV-Id1 transgenic mice.** **A.** Flow cytometry analysis of MECs derived from virgin wild-type and MMTV-Id-1 transgenic mice using antibodies against the luminal markers keratin 8, ER, and PR. The dot plot shows the percentage of luminal marker-positive cells (Cy5-positive; lower right quadrant). The FITC channel was used as a negative control to determine background fluorescence. **B.** Quantitative immunocytochemical analysis results of the expression of the luminal markers keratin 8, ER, and PR in MaSCs, Ma-CFCs, and MECs (shown as a bar graph). The results of all experiments are shown as the means  $\pm$  SD ( $n = 3$  independent experiments;  $*P < 0.05$  vs. control, Student  $t$  test).

**Supplementary Table S1: Effect of Id1 on the expression of mouse stem cell-specific genes**

| Gene symbol         | Description                                        | Fold change | p-value |
|---------------------|----------------------------------------------------|-------------|---------|
| Upregulated genes   |                                                    |             |         |
| Cd3d                | CD3 antigen, delta polypeptide                     | 8.99        | 0.022   |
| T                   | Brachyury                                          | 5.74        | 0.034   |
| Ncam1               | Neural cell adhesion molecule 1                    | 3.34        | 0.024   |
| Dhh                 | Desert hedgehog                                    | 3.33        | 0.006   |
| Actc1               | Actin, alpha, cardiac muscle 1                     | 3.24        | 0.014   |
| Hdac1               | Histone deacetylase 1                              | 3.09        | 0.018   |
| Rb1                 | Retinoblastoma 1                                   | 2.94        | 0.047   |
| Cd8b1               | CD8 antigen, beta chain 1                          | 2.41        | 0.008   |
| Cd44                | CD44 antigen                                       | 2.15        | 0.008   |
| Cdh2                | Cadherin 2                                         | 1.94        | 0.000   |
| Wnt1                | Wingless-related MMTV integration site 1           | 1.94        | 0.040   |
| Cd4                 | CD4 antigen                                        | 1.91        | 0.022   |
| Myc                 | Myelocytomatosis oncogene                          | 1.89        | 0.000   |
| Fgf1                | Fibroblast growth factor 1                         | 1.76        | 0.033   |
| Ctnna1              | Catenin (cadherin-associated protein), alpha 1     | 1.75        | 0.034   |
| Ccnd2               | Cyclin D2                                          | 1.72        | 0.021   |
| Apc                 | Adenomatosis polyposis coli                        | 1.72        | 0.034   |
| Msx1                | Homeobox, msh-like 1                               | 1.57        | 0.030   |
| Fgfr1               | Fibroblast growth factor receptor 1                | 1.53        | 0.029   |
| Ccna2               | Cyclin A2                                          | 1.52        | 0.020   |
| Gdf2                | Growth differentiation factor 2                    | 1.50        | 0.001   |
| Downregulated genes |                                                    |             |         |
| Aldh2               | Aldehyde dehydrogenase 2, mitochondrial            | -10.64      | 0.040   |
| Frat1               | Frequently rearranged in advanced T-cell lymphomas | -6.64       | 0.018   |
| Notch1              | Notch gene homolog 1 ( <i>Drosophila</i> )         | -3.20       | 0.046   |
| Btrc                | Beta-transducin repeat-containing protein          | -2.90       | 0.020   |
| Dll1                | Delta-like 1 ( <i>Drosophila</i> )                 | -2.87       | 0.038   |
| Tert                | Telomerase reverse transcriptase                   | -2.53       | 0.022   |
| Ep300               | E1A binding protein p300                           | -2.25       | 0.020   |
| Myst2               | MYST histone acetyltransferase 2                   | -2.22       | 0.009   |
| Fzd1                | Frizzled homolog 1 ( <i>Drosophila</i> )           | -1.92       | 0.003   |
| Axin1               | Axin 1                                             | -1.78       | 0.000   |
| Mme                 | Membrane metallo-endopeptidase                     | -1.54       | 0.000   |

Relative expression of mouse stem cell genes in MaSCs from MMTV-Id1 transgenic mice compared to those from wild-type mice was analyzed using Mouse Stem Cell RT<sup>2</sup> Profiler™ PCR Arrays. Samples were examined in triplicate and data were analyzed statistically by Student's *t* test.
